# Supplementary material
Source: Springer Nature journal article supplement (https://www.springermedizin.de/resource/supplementary/12935_2009_208_MOESM3_ESM.pdf/9541376)

**A**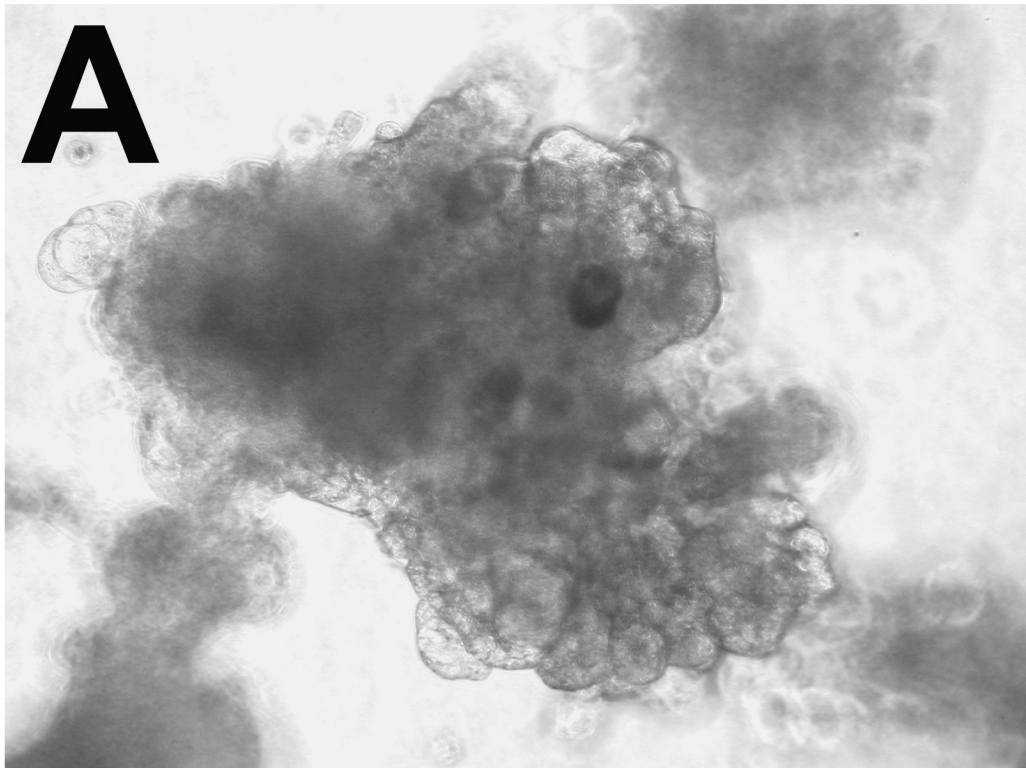**B**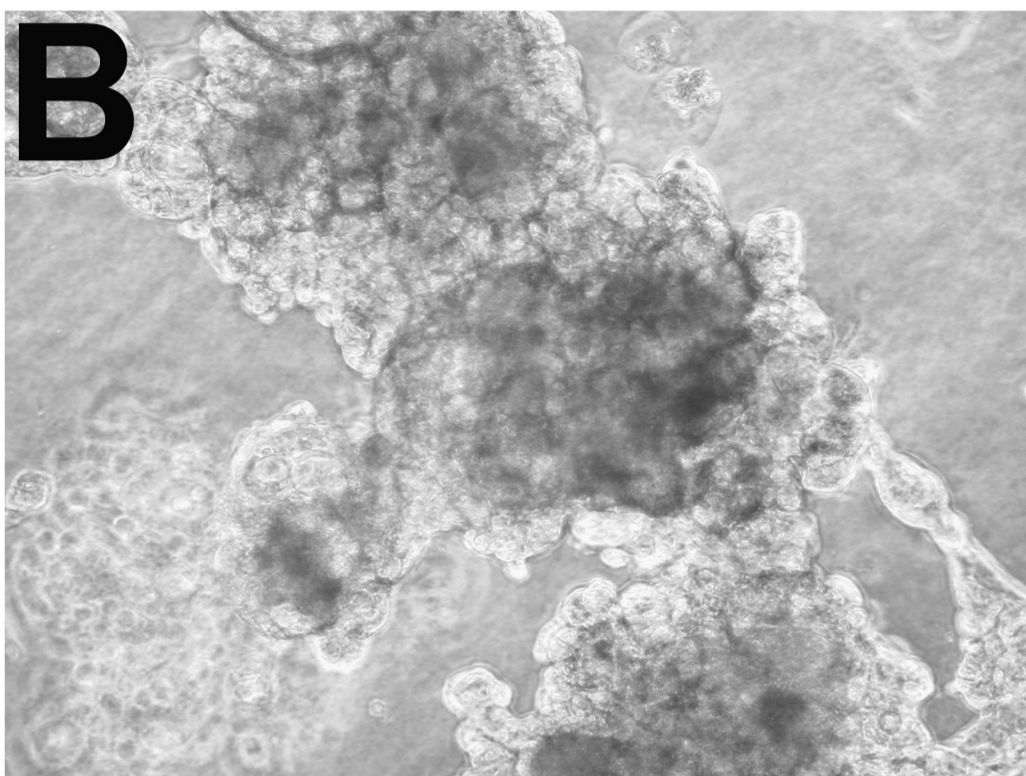**C**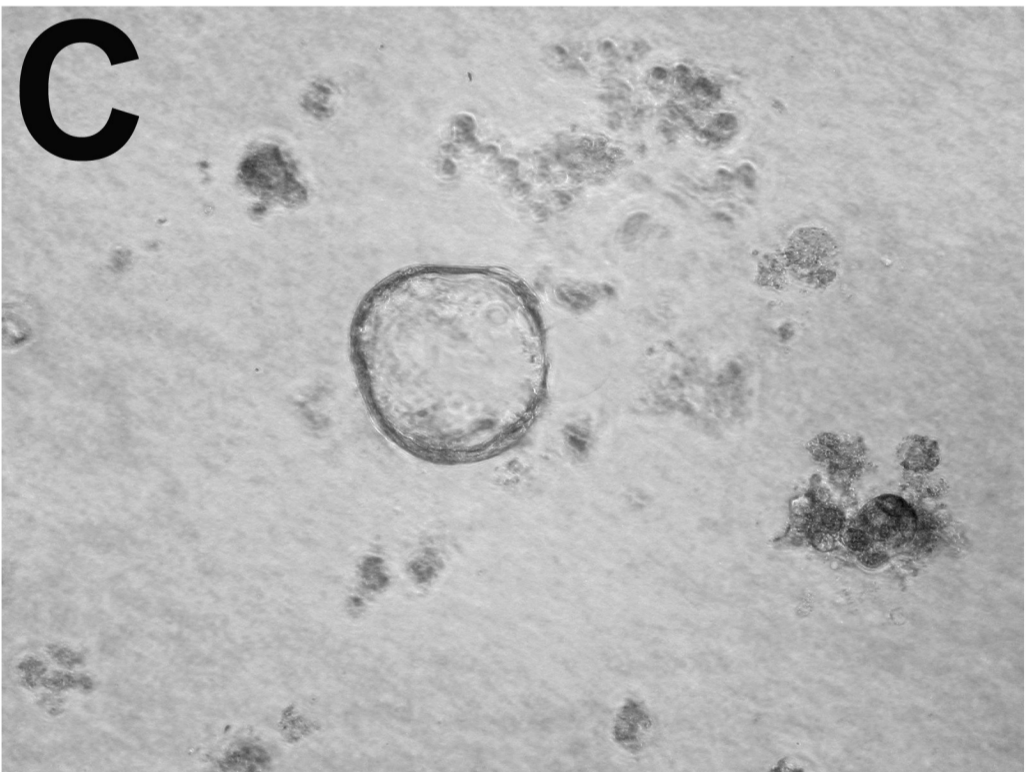**D**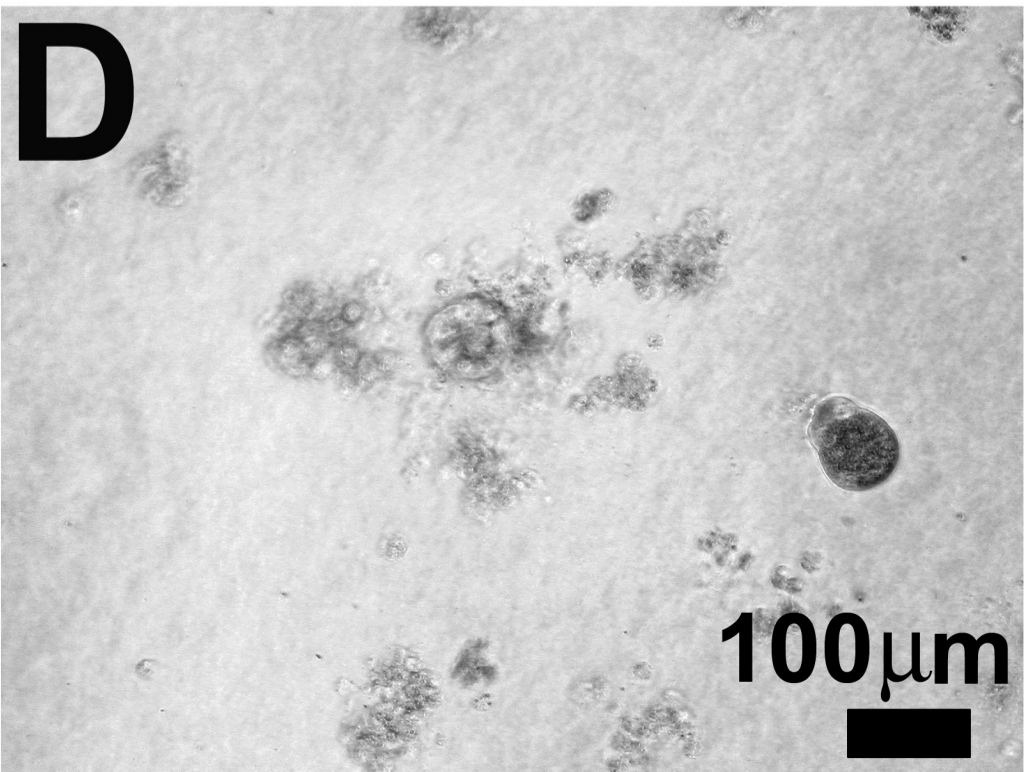

Supplement: MOESM3 [file 9541376]
